# Supplementary material
Source: PubMed Central journal article supplement (PMC7126597)
Supplement: mmc1.pdf [file mmc1.pdf]

# Supplementary material

## A Direct Isothermal Amplification System Adapted for Rapid SNP Genotyping of Multifarious Sample Types

Xiaonan Liu<sup>a,1</sup>, Chao Zhang<sup>a,1</sup>, Mengye Zhao<sup>a</sup>, Kewu Liu<sup>a</sup>, Hang Li<sup>a</sup>, Ningning Li<sup>b</sup>,  
Linlin Gao<sup>a</sup>, Xuemin Yang<sup>a</sup>, Ting Ma<sup>d</sup>, Juanli Zhu<sup>c</sup>, Wenli Hui<sup>a,e</sup>, Kai Hua<sup>a,e,\*</sup>, Yali  
Cui<sup>a,c,e,\*</sup>

<sup>a</sup> College of Life Sciences, Northwest University, Xi'an, Shaanxi, 710069, China.

<sup>b</sup> The Seventh Affiliated Hospital of Sun Yat-sen University, Shenzhen, 518107, China.

<sup>c</sup> Shaanxi Provincial Engineering Research Center for Nano-Biomedical Detection, Xi'an, 710077, China.

<sup>d</sup> Shaanxi Provincial People's Hospital, Xi'an, Shaanxi, 710068, China.

<sup>e</sup> National Engineering Research Center for Miniaturized Detection System, Xi'an, Shaanxi, 710069, China.

\* Corresponding Authors.

E-mail addresses: kaihua@nwu.edu.cn. (Kai Hua), yalicui@nwu.edu.cn. (Yali Cui).

<sup>1</sup> These authors contributed equally to this work.

**Table S1.** Primer sequences used for sequencing and Direct-LAMP (M=mutation type, WT=wild type)

| Allele                | Application               | Primer     | Sequence (5'-3')                            |                         |
|-----------------------|---------------------------|------------|---------------------------------------------|-------------------------|
| <i>MTHFR</i><br>C677T | Sequencing                | Forward    | CCCAGTCCCTGTGGTCTCTTC                       |                         |
|                       |                           | Reverse    | CAACAAACCCCTCAACAGACT                       |                         |
|                       | Direct-LAMP               | FIP-WT     | GCTCCCGCAGACACCTTCTCCTGGAGCTTTGAGGCTGACC    |                         |
|                       |                           | FIP-M      | ACTCCCGCAGACACCTTCTCCTGGAGCTTTGAGGCTGACC    |                         |
|                       |                           | BIP-WT     | CCGATTTTCATCATCACGCAGCTTGCCTTCACAAAGCGGAAG  |                         |
|                       |                           | BIP-M      | TCGATTTTCATCATCACGCAGCTTGCCTTCACAAAGCGGAAG  |                         |
|                       |                           | F3         | GTTACCCCAAAGGCCACC                          |                         |
|                       |                           | B3         | AGTGATGCCCATGTCGGT                          |                         |
|                       | <i>ALDH2</i><br>Glu504Lys | Sequencing | Forward                                     | GTAACCCATAACCCCAAGAGT   |
|                       |                           |            | Reverse                                     | GCACGTCCCTCAGTATTTCTCAT |
| Direct-LAMP           |                           | FIP-WT     | CAGTGTATGCCTGCAGCCCGTATAACAAGATGTCGGGGAGTGG |                         |
|                       |                           | FIP-M      | TAGTGTATGCCTGCAGCCCGTATAACAAGATGTCGGGGAGTGG |                         |
|                       |                           | BIP-WT     | GAAGTGAAAACACTGTGAGTGTGGCAGCAGACCCTCAAGCC   |                         |
|                       |                           | BIP-M      | AAAGTGAAAACACTGTGAGTGTGGCAGCAGACCCTCAAGCC   |                         |
|                       |                           | F3         | GATGTGTTTGGAGCCAGT                          |                         |
|                       |                           | B3         | CCCAACAGACCCCAATCC                          |                         |

**Table S2.** Genotyping results and frequency of whole blood and dried blood spot samples of *MTHFR* C677T polymorphism (type-specific concordance between Direct-LAMP and sequencing)

| Direct-LAMP<br>(blood,<br>n=50) | Direct-LAMP (dried blood spot,<br>n=50) |    |    |            | Total | Sequencing (n=50) |    |    |            | Total | Agreement | Frequency |
|---------------------------------|-----------------------------------------|----|----|------------|-------|-------------------|----|----|------------|-------|-----------|-----------|
|                                 | CC                                      | CT | TT | Discrepant |       | CC                | CT | TT | Discrepant |       |           |           |
| CC                              | 19                                      | 0  | 0  | 0          | 19    | 19                | 0  | 0  | 0          | 19    | 100%      | 38% (F1)  |
| CT                              | 0                                       | 20 | 0  | 0          | 20    | 0                 | 20 | 0  | 0          | 20    | 100%      | 40% (F2)  |
| TT                              | 0                                       | 0  | 11 | 0          | 11    | 0                 | 0  | 11 | 0          | 11    | 100%      | 22% (F3)  |
| Total                           | 19                                      | 20 | 11 | 0          | 50    | 19                | 20 | 11 | 0          | 50    | 100%      | 100%      |

**Table S3.** Genotyping results and frequency of buccal swab and saliva samples of *ALDH2* Glu504Lys polymorphism (type-specific concordance between Direct-LAMP and sequencing)

| Direct-LAMP<br>(saliva,<br>n=50) | Direct-LAMP (buccal swab, n=50) |    |    |            |       | Sequencing (n=50) |    |    |            |       | Agreement | Frequency |
|----------------------------------|---------------------------------|----|----|------------|-------|-------------------|----|----|------------|-------|-----------|-----------|
|                                  | GG                              | GA | AA | Discrepant | Total | GG                | GA | AA | Discrepant | Total |           |           |
| GG                               | 17                              | 0  | 0  | 0          | 17    | 17                | 0  | 0  | 0          | 17    | 100%      | 34% (F1)  |
| GA                               | 0                               | 32 | 0  | 0          | 32    | 0                 | 32 | 0  | 0          | 32    | 100%      | 64% (F2)  |
| AA                               | 0                               | 0  | 1  | 0          | 1     | 0                 | 0  | 1  | 0          | 1     | 100%      | 2% (F3)   |
| Total                            | 17                              | 32 | 1  | 0          | 50    | 17                | 32 | 1  | 0          | 50    | 100%      | 100%      |

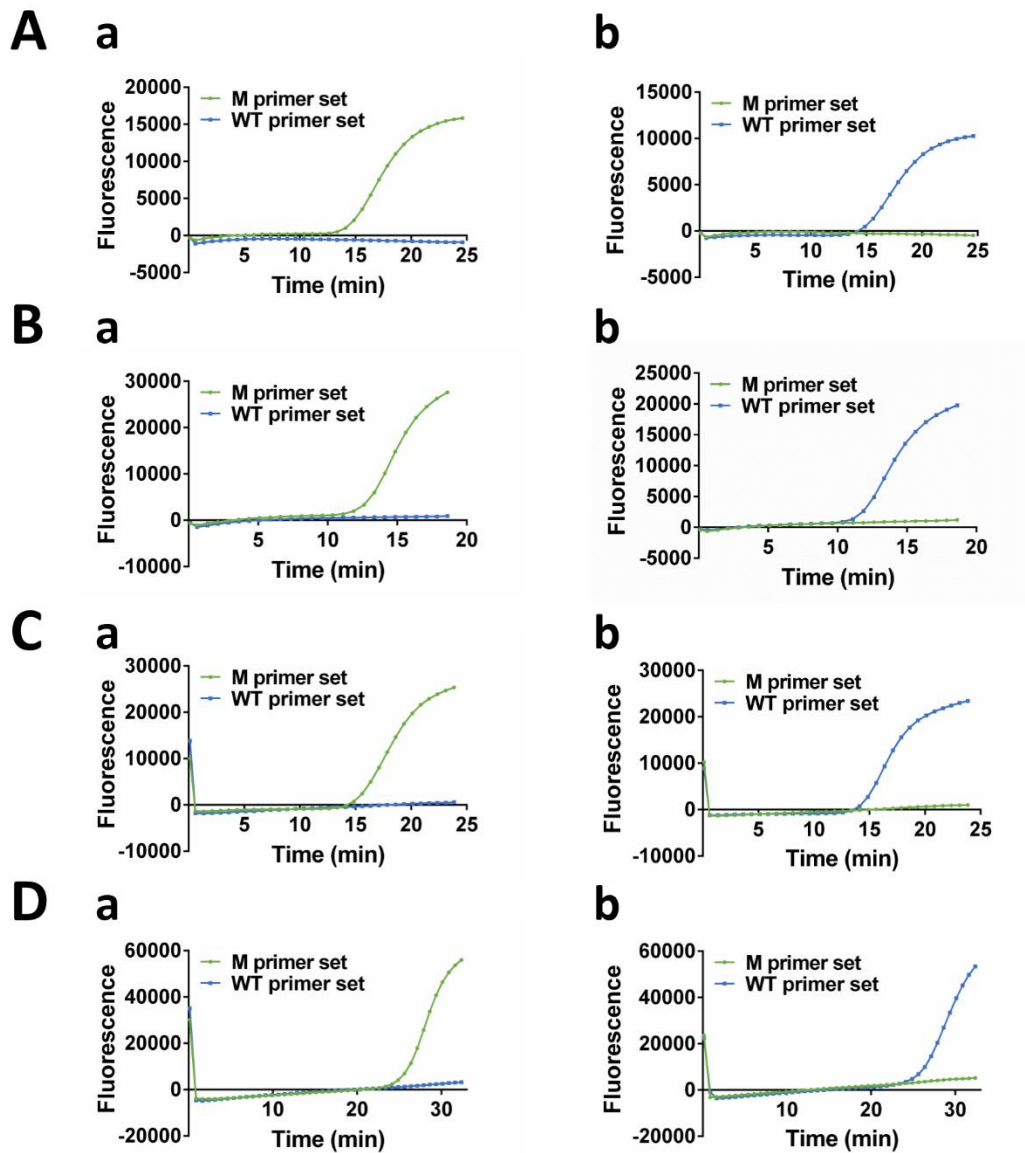

**Fig. S1.** Fluorescence curve of Direct-LAMP performed with (A) whole blood samples ((a) homozygous mutation type, (b) wild type), (B) dried blood spot samples ((a) homozygous mutation type, (b) wild type), (C) saliva samples ((a) homozygous mutation type, (b) wild type) and (D) buccal swab samples ((a) homozygous mutation type, (b) wild type) for *MTHFR* C677T genotyping.

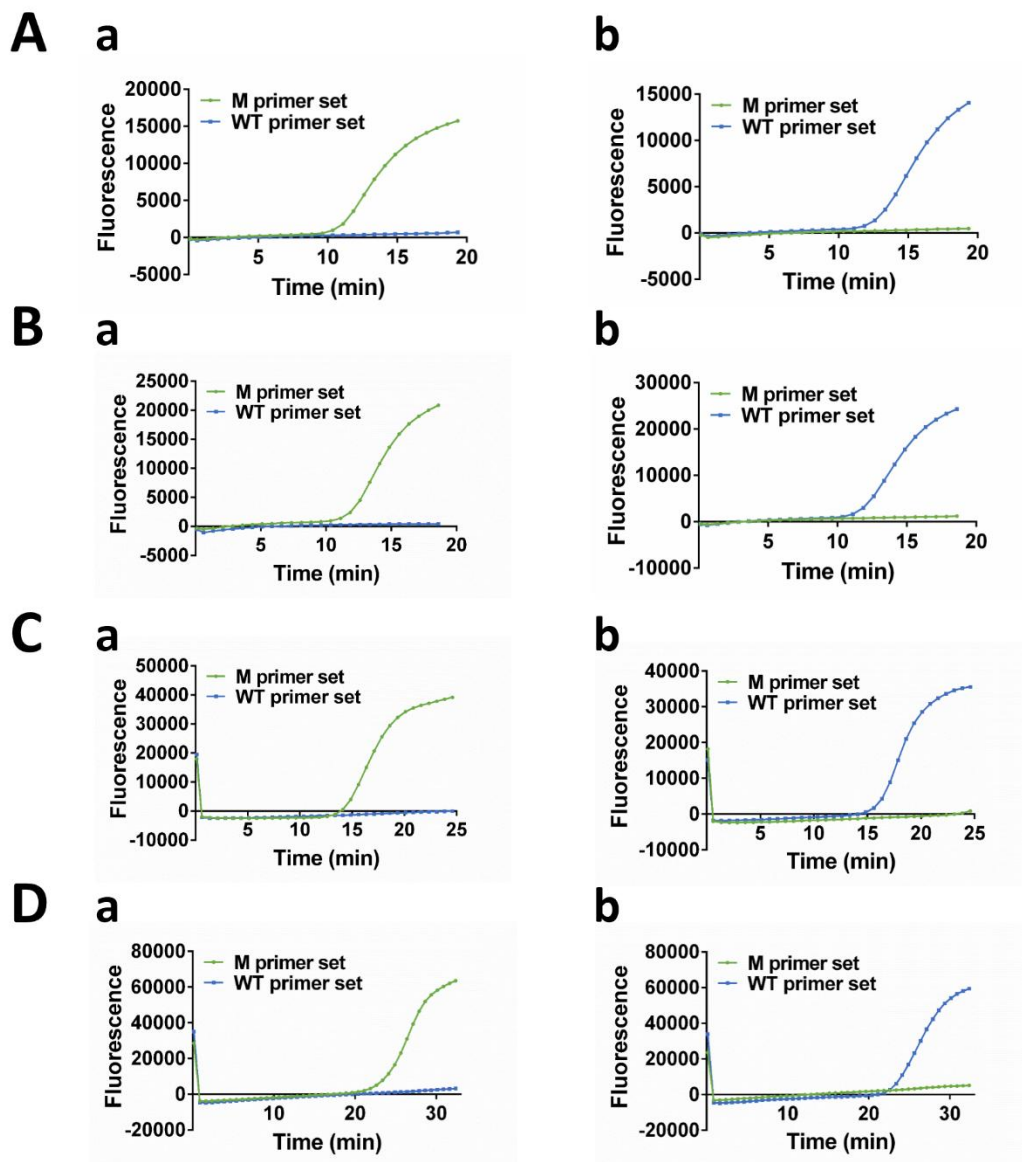

**Fig. S2.** Fluorescence curve of Direct-LAMP performed with (A) whole blood samples ((a) homozygous mutation type, (b) wild type), (B) dried blood spot samples ((a) homozygous mutation type, (b) wild type), (C) saliva samples ((a) homozygous mutation type, (b) wild type) and (D) buccal swab samples ((a) homozygous mutation type, (b) wild type) for *ALDH2* Glu504Lys genotyping.
